# Supplementary material for: Investigation of a SARS-CoV-2 Outbreak at an Automotive Manufacturing Site in England
Source: MDPI journal article supplement (doi:10.3390/ijerph19116400), 2022-05-24
Supplement: s1 [file s1]

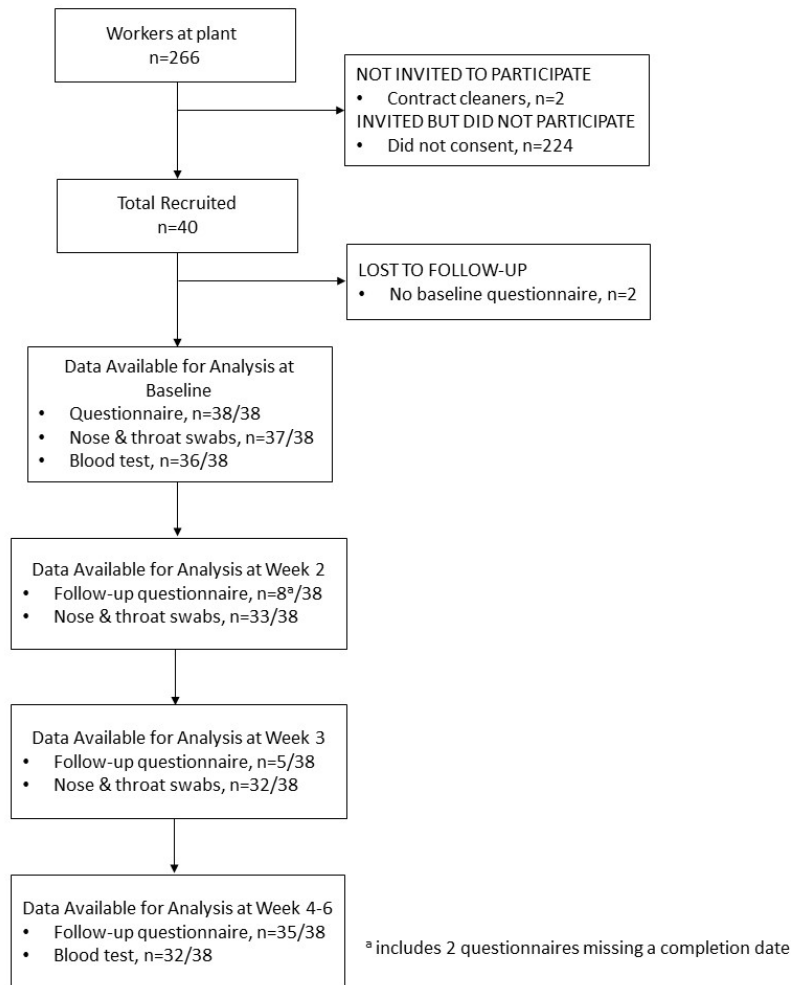

Figure S1. Flow diagram of workers from an automotive manufacturing site participating in COVID-OUT.

**Table S1. Participant demographic and non-work factor related responses to baseline COVID-OUT study questionnaire**

|                                         |                      | <b>Non-cases<br/>(n=34)</b> | <b>Cases<br/>(n=4)</b> | <b>Total<br/>(n=38)</b> |
|-----------------------------------------|----------------------|-----------------------------|------------------------|-------------------------|
| <b>Demographic information</b>          |                      |                             |                        |                         |
| Sex                                     | Male                 | 15 (45.5)                   | 3 (75)                 | 18 (48.6)               |
|                                         | Female               | 18 (54.5)                   | 1 (25)                 | 19 (51.4)               |
|                                         | Missing              | 1                           | 0                      | 1                       |
| Age                                     | Mean (range)         | 38.8 (21-54)                | 52.7 (41-64)           | 39.7 (21 - 64)          |
|                                         | Missing              | 0                           | 1                      | 1                       |
| Co-morbidities                          | Diabetes             | 0                           | 0                      | 0                       |
|                                         | High blood pressure  | 3 (8.8)                     | 1 (25)                 | 4 (10.5)                |
|                                         | Asthma               | 1 (2.9)                     | 1 (25)                 | 2 (5.3)                 |
|                                         | Chronic lung issues  | 0                           | 0                      | 0                       |
|                                         | Chronic heart issues | 0                           | 0                      | 0                       |
|                                         | Previous stroke      | 0                           | 0                      | 0                       |
|                                         | None reported        | 30 (88.2)                   | 2 (50)                 | 32 (84.2)               |
| BMI categorical                         | Healthy weight       | 12 (36.4)                   | 0                      | 12 (31.6)               |
|                                         | Overweight           | 9 (27.3)                    | 3 (100)                | 12 (31.6)               |
|                                         | Obese                | 12 (36.4)                   | 0                      | 12 (31.6)               |
|                                         | Missing              | 1                           | 1                      | 2                       |
| Smoking status                          | Never                | 18 (52.9)                   | 1 (25)                 | 19 (50)                 |
|                                         | Former               | 6 (17.6)                    | 3 (75)                 | 9 (23.7)                |
|                                         | Current              | 10 (29.4)                   | 0                      | 10 (26.3)               |
| E-cigarettes use                        | Never                | 25 (73.5)                   | 3 (75)                 | 28 (73.6)               |
|                                         | Former               | 4 (11.8)                    | 1 (25)                 | 5 (13.2)                |
|                                         | Current              | 5 (14.7)                    | 0                      | 5 (13.2)                |
| <b>Non-work factors</b>                 |                      |                             |                        |                         |
| Members of household aged $\leq 19$     | No                   | 15 (46.9)                   | 3 (100)                | 18 (51.4)               |
|                                         | Yes                  | 17 (53.1)                   | 0                      | 17 (48.6)               |
|                                         | Missing              | 2                           | 1                      | 3                       |
| Members of household who are co-workers | No                   | 25 (78.1)                   | 1 (33.3)               | 26 (74.3)               |
|                                         | Yes                  | 7 (21.9)                    | 2 (66.7)               | 9 (25.7)                |
|                                         | Missing              | 2                           | 1                      | 3                       |
| Visit to shops                          | No                   | 0                           | 2 (100)                | 2 (5.9)                 |
|                                         | Yes                  | 32 (100)                    | 0                      | 32 (94.1)               |
|                                         | Missing              | 2                           | 2                      | 4                       |
| Visit to place of entertainment         | No                   | 32 (100)                    | 3 (100)                | 35 (100)                |
|                                         | Yes                  | 0                           | 0                      | 0                       |
|                                         | Missing              | 2                           | 1                      | 3                       |
| Visit to public buildings               | No                   | 26 (83.9)                   | 3 (100)                | 29 (85.3)               |
|                                         | Yes                  | 5 (16.1)                    | 0                      | 5 (14.7)                |
|                                         | Missing              | 3                           | 1                      | 4                       |
| Visit to educational facilities         | No                   | 26 (83.9)                   | 3 (100)                | 29 (85.3)               |
|                                         | Yes                  | 5 (16.1)                    | 0                      | 5 (14.7)                |
|                                         | Missing              | 3                           | 1                      | 4                       |
| Visit to childcare facilities           | No                   | 25 (81.3)                   | 3 (75)                 | 28 (80)                 |
|                                         | Yes                  | 7 (21.9)                    | 0                      | 7 (20)                  |

|                                                                |         |           |         |           |
|----------------------------------------------------------------|---------|-----------|---------|-----------|
|                                                                | Missing | 2         | 1       | 3         |
| Visit to public transport facilities (e.g. stations, airports) | No      | 32 (100)  | 3 (100) | 35 (100)  |
|                                                                | Yes     | 0         | 0       | 0         |
|                                                                | Missing | 2         | 1       | 3         |
| Visit to public transport                                      | No      | 29 (90.6) | 3 (100) | 32 (91.4) |
|                                                                | Yes     | 3 (9.4)   | 0       | 3 (8.6)   |
|                                                                | Missing | 2         | 1       | 3         |
| Visit to care home                                             | No      | 32 (100)  | 3 (100) | 35 (100)  |
|                                                                | Yes     | 0         | 0       | 0         |
|                                                                | Missing | 2         | 1       | 3         |
| Visit to private home for socialising                          | No      | 29 (90.6) | 3 (100) | 32 (91.4) |
|                                                                | Yes     | 3 (9.4)   | 0       | 3 (8.6)   |
|                                                                | Missing | 2         | 1       | 3         |
| Visit to private home to care for elderly/ vulnerable adult    | No      | 30 (93.8) | 3 (100) | 33 (94.3) |
|                                                                | Yes     | 2 (6.3)   | 0       | 2 (5.7)   |
|                                                                | Missing | 2         | 1       | 3         |
| Visit to salon                                                 | No      | 31 (100)  | 3 (100) | 34 (100)  |
|                                                                | Yes     | 0         | 0       | 0         |
|                                                                | Missing | 3         | 1       | 4         |
| Visit to indoor fitness/ sport facilities                      | No      | 31 (100)  | 3 (100) | 34 (100)  |
|                                                                | Yes     | 0         | 0       | 0         |
|                                                                | Missing | 3         | 1       | 4         |
| Visit to park                                                  | No      | 11 (34.4) | 3 (100) | 14 (40)   |
|                                                                | Yes     | 21 (65.6) | 0       | 21 (60)   |
|                                                                | Missing | 2         | 1       | 3         |
| Visit to doctor                                                | No      | 20 (62.5) | 3 (100) | 23 (65.7) |
|                                                                | Yes     | 12 (37.5) | 0       | 12 (34.3) |
|                                                                | Missing | 2         | 1       | 3         |
| International travel                                           | No      | 30 (100)  | 3 (100) | 33 (100)  |
|                                                                | Yes     | 0         | 0       | 0         |
|                                                                | Missing | 4         | 1       | 5         |
| Domestic travel                                                | No      | 28 (100)  | 3 (100) | 31 (100)  |
|                                                                | Yes     | 0         | 0       | 0         |
|                                                                | Missing | 6         | 1       | 7         |
